# Supplementary material
Source: PubMed Central journal article supplement (PMC10833739)
Supplement: NIHPP2023.11.06.565774v2-supplement-1.pdf [file NIHPP2023.11.06.565774v2-supplement-1.pdf]

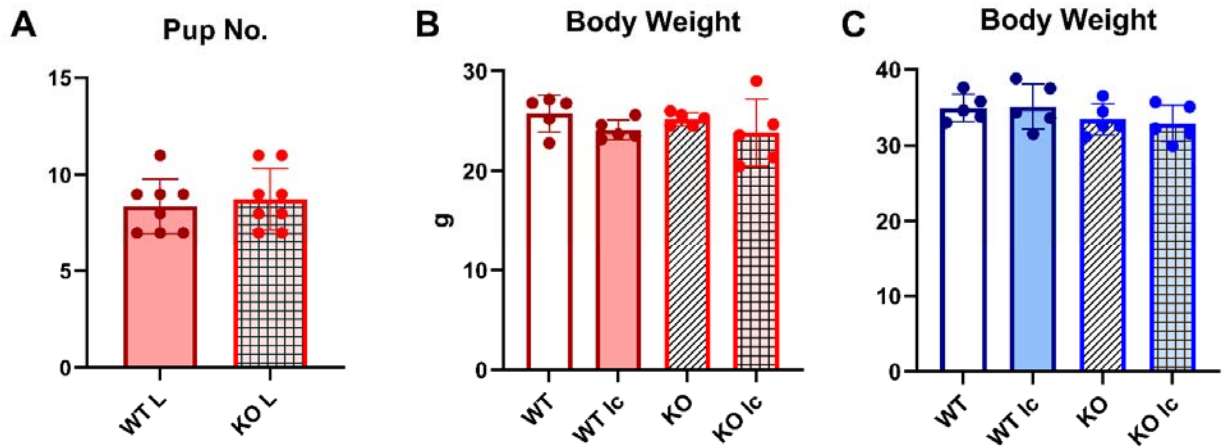

1147  
1148  
1149 **Supplementary Figure 1: Pup numbers for the lactation experiment and**  
1150 **body weight measurements for the low-calcium-diet experiment**

1151 Panel A shows total pup numbers in WT and KO female mice that underwent  
1152 pregnancy and 2 weeks of lactation. There is no significant differences in the pup  
1153 numbers between genotypes. Students t-test was performed for statistical analysis. n=  
1154 8/group.

1155 Panels B and C show total body weight of WT and KO female (B) and male (C)  
1156 mice. No statistically significant difference was found among the groups, regardless of  
1157 genotype or diet. 2-way ANOVA was performed. n= 4-5/group. As depicted here, red is  
1158 female, and blue is male.

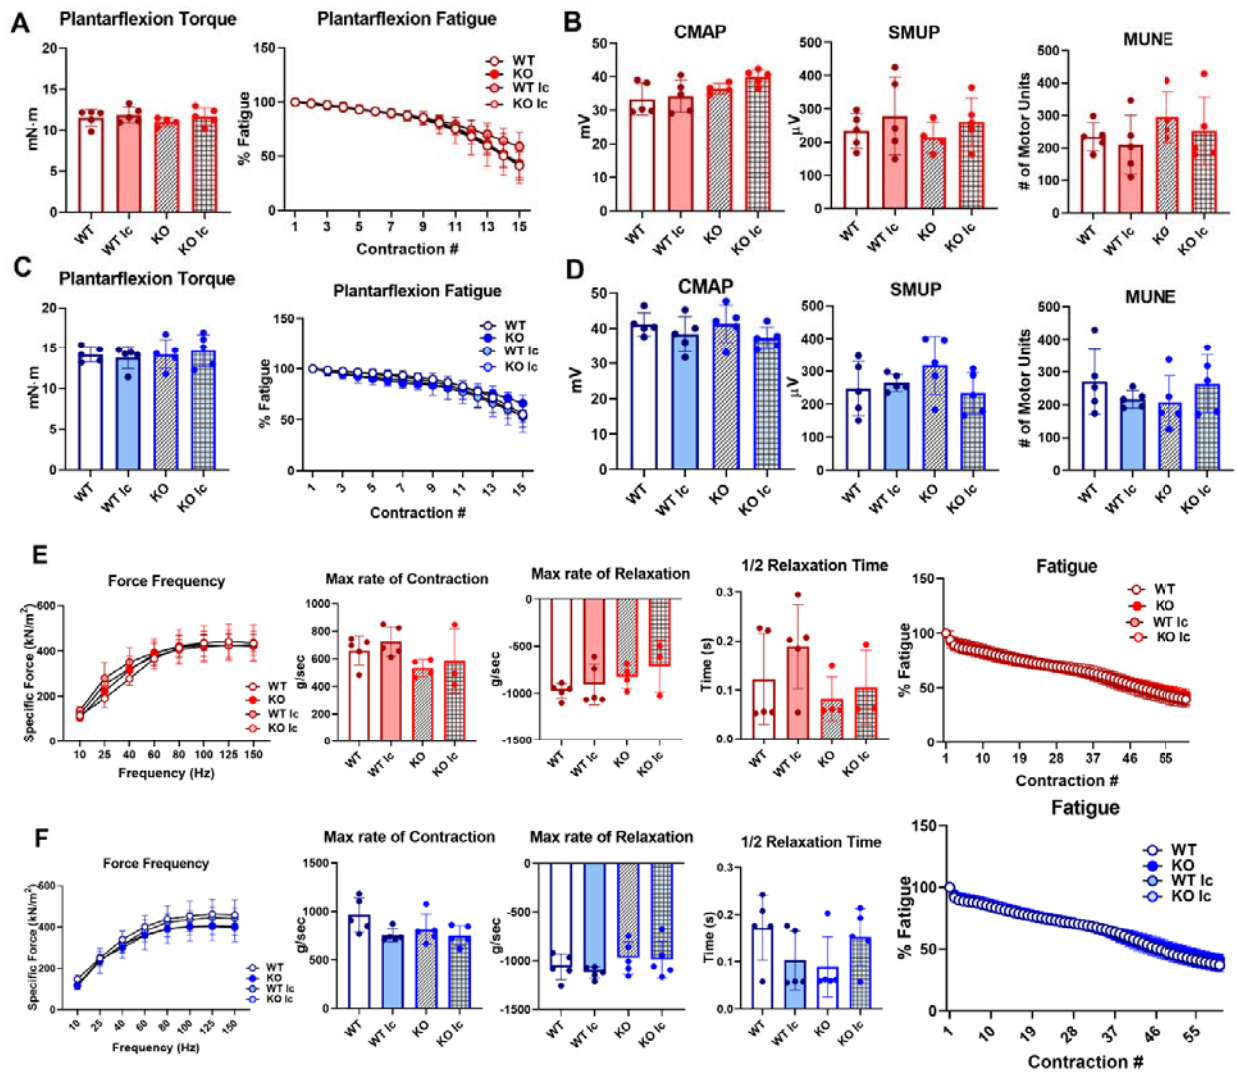

1159  
1160 **Supplementary Figure 2: Neither genotype nor dietary calcium alters**  
1161 **muscle functions *in vivo* or *ex vivo***

1162 Panels A and C show *in vivo* muscle plantarflexion force (reported as  
1163 plantarflexion torque and plantarflexion fatigue) in WT and KO female (A) and male (C)  
1164 mice on a control or a low calcium diet, panels B and D show muscle electrophysiology  
1165 parameters of CMAP, SMUP, and MUNE in WT and KO female (B) and male (D) mice,  
1166 and panels E and F show *ex vivo* EDL functional measurement (reported as specific  
1167 force frequency, maximum rate of contraction, maximum rate of relaxation, half-  
1168 relaxation time, and % fatigue) in WT and KO female (E) and male (F) mice

1169 2-way ANOVA was performed. n= 4-5/group. As depicted here, red is female,  
1170 and blue is male.

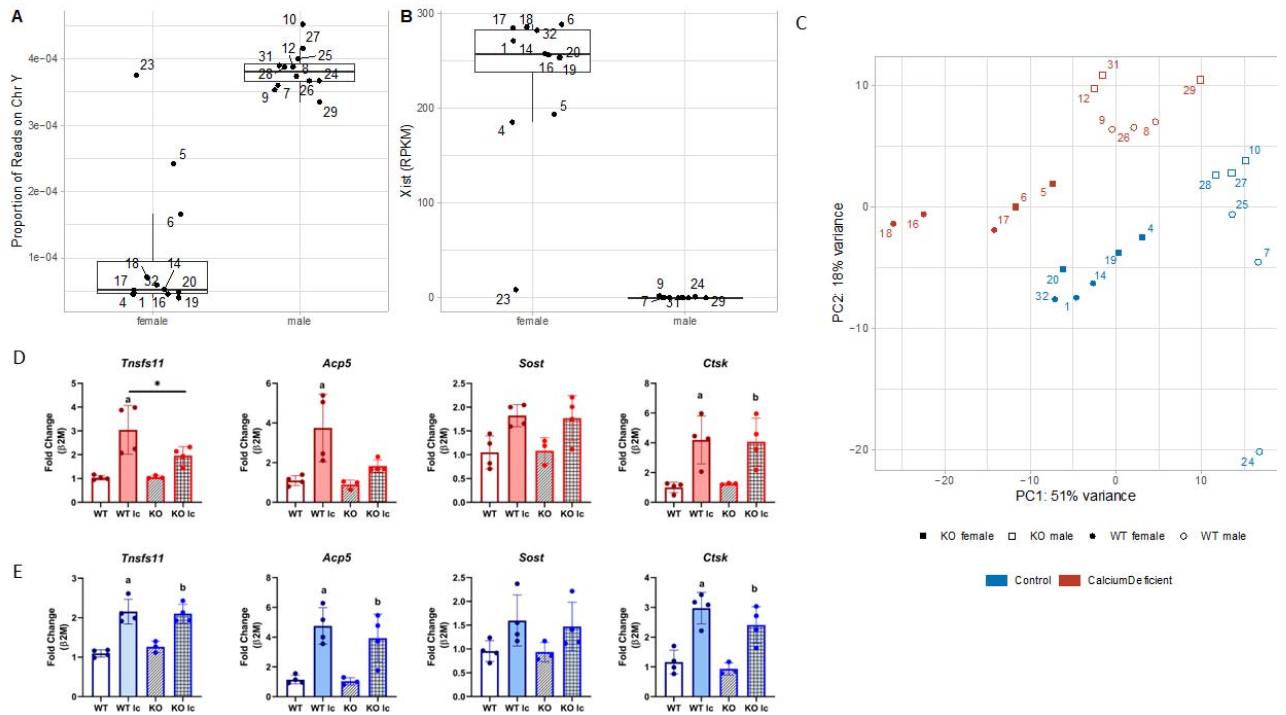

### Supplementary Figure 3: Quality control and validation of RNA sequencing

Sanity check of data on the sample's sex. A: Boxplot of proportional of reads on chromosome Y. Male should have a higher value than female. B: Boxplot of RPKM of *Xist*. Males should have very low expression of *Xist*.

C: Scatter plot of PC1 and PC2 from Principal Component Analysis (PCA) of gene expression data.

D: qPCR analysis of *Tnsfs11*, *Acp5*, *Sost*, and *Ctsk* genes from osteocyte-enriched bone chips from female samples. n= 3-4/sample. Two-way ANOVA was performed for statistical analysis. Gene fold-change was normalized using  $\beta$ -2-microglobulin as the housekeeping gene. a= Significantly different from WT, b= Significantly different from KO, \*= p < 0.05.

E: qPCR analysis of *Tnsfs11*, *Acp5*, *Sost*, and *Ctsk* genes from osteocyte-enriched bone chips from male samples. n= 3-4/sample. Two-way ANOVA was performed for statistical analysis. Gene fold-change was normalized using  $\beta$ -2-microglobulin as the housekeeping gene. a= Significantly different from WT, b= Significantly different from KO, \*= p < 0.05.

| Bone Parameters                           | Virgin        |               | Lactation                  |                             |
|-------------------------------------------|---------------|---------------|----------------------------|-----------------------------|
|                                           | WT            | KO            | WT                         | KO                          |
| <b>Femoral cortical bone parameters</b>   |               |               |                            |                             |
| Ct. B. Ar/T. Ar (%)                       | 47.4 ± 1.2    | 48 ± 1        | 35.2 ± 1.8 <sup>a</sup>    | 37.5 ± 1.8 <sup>b, c</sup>  |
| Ct. Th (mm)                               | 0.18 ± 0.004  | 0.19 ± 0.005  | 0.13 ± 0.004 <sup>a</sup>  | 0.14 ± 0.01 <sup>b, c</sup> |
| Ps. Pm (mm)                               | 5.16 ± 0.2    | 5.2 ± 0.06    | 5.18 ± 0.16                | 5.2 ± 0.14                  |
| Es. Pm (mm)                               | 3.95 ± 0.1    | 4 ± 0.13      | 4.4 ± 0.11 <sup>a</sup>    | 4.3 ± 0.09 <sup>b</sup>     |
| Marrow cavity area (mm <sup>2</sup> )     | 0.93 ± 0.1    | 0.93 ± 0.04   | 1.16 ± 0.05 <sup>a</sup>   | 1.13 ± 0.05 <sup>b</sup>    |
| <b>Femoral trabecular bone parameters</b> |               |               |                            |                             |
| BV/TV (%)                                 | 3.7 ± 1       | 4.5 ± 0.8     | 3.1 ± 0.7                  | 4 ± 1.1                     |
| Tb. Th (mm)                               | 0.043 ± 0.002 | 0.044 ± 0.001 | 0.039 ± 0.002 <sup>a</sup> | 0.039 ± 0.001 <sup>b</sup>  |
| Tb. Sp (mm)                               | 0.37 ± 0.05   | 0.36 ± 0.03   | 0.57 ± 0.15 <sup>a</sup>   | 0.44 ± 0.09                 |
| Tb. N (1/mm)                              | 0.85 ± 0.2    | 1.06 ± 0.2    | 0.8 ± 0.2                  | 1.04 ± 0.25                 |

1188

| Bone parameters                   | Change   | % Change |        |
|-----------------------------------|----------|----------|--------|
|                                   |          | WT       | KO     |
| Cortical Bone Area Fraction       | Decrease | 26%      | 22% *  |
| Cortical Thickness                | Decrease | 29%      | 24% *  |
| Ultimate Force                    | Decrease | 38%      | 31% *  |
| Osteoclast Number/ bone parameter | Increase | 141%     | 129%   |
| TRAP-positive osteocytes          | Increase | 101%     | 175% * |
| Lacunar Area                      | Increase | 26%      | 15% *  |
| Serum RANKL                       | Increase | 170%     | 80% *  |

1189

**Supplementary Table 1: FNDC5 KO mice femurs are partially resistant to lactation-induced bone loss.**

1190

1191

Femoral cortical and trabecular bone parameters of WT and FNDC5 KO female virgin and lactation mice. n = 5-8/group. Data presented as mean ± standard deviation.

1192

1193

a= significant compared to WT control, b= significant compared to KO control, c= significant compared to WT low Ca diet, 2-way ANOVA, significance <0.05, n= 8/group.

1194

1195  
1196  
1197

Percentage change in different bone and serum parameters in WT and FNDC5 KO female mice with lactation. \* = p<0.05 compared to WT.

| Bone Parameters                           | Female Normal Diet |                 | Female Low Ca Diet           |                                | Male Normal Diet |                             | Male Low Ca Diet         |                              |
|-------------------------------------------|--------------------|-----------------|------------------------------|--------------------------------|------------------|-----------------------------|--------------------------|------------------------------|
|                                           | WT                 | KO              | WT                           | KO                             | WT               | KO                          | WT                       | KO                           |
| <b>Ex vivo femur DXA</b>                  |                    |                 |                              |                                |                  |                             |                          |                              |
| BMD (mg/cm <sup>2</sup> )                 | 75.4±<br>2.4       | 76.6±<br>1.5    | 65.4±<br>4.3 <sup>a</sup>    | 71.4±<br>3.4 <sup>c</sup>      | 74.6±<br>1.5     | 78.3±<br>3 <sup>a</sup>     | 68.2±<br>3               | 68.1±<br>2 <sup>b</sup>      |
| BMC (g)                                   | 0.03±<br>0.002     | 0.03±<br>0.001  | 0.024±<br>0.002 <sup>a</sup> | 0.027±<br>0.002 <sup>b,c</sup> | 0.029±<br>0.002  | 0.032±<br>0.004             | 0.026±<br>0.002          | 0.025±<br>0.003 <sup>b</sup> |
| <b>Femoral cortical bone parameters</b>   |                    |                 |                              |                                |                  |                             |                          |                              |
| Ct.                                       | 47.8±              | 48.4±           | 41.6±                        | 45.2±                          | 40.1±            | 43.6±                       | 38.3±                    | 39.1±                        |
| B.Ar/T.Ar%                                | 1.6                | 0.4             | 1.1 <sup>a</sup>             | 1.4 <sup>b,c</sup>             | 1.4              | 0.6 <sup>a</sup>            | 0.9                      | 1.2 <sup>b</sup>             |
| Ct. Th (mm)                               | 0.2±<br>0.01       | 0.2±<br>0.01    | 0.15±<br>0.01 <sup>a</sup>   | 0.17±<br>0.01 <sup>b,c</sup>   | 0.15±<br>0.01    | 0.2±<br>0.01 <sup>a</sup>   | 0.14±<br>0.01            | 0.14±<br>0.01 <sup>b</sup>   |
| Marrow Cavity Area                        | 0.92 ±<br>0.04     | 0.86±<br>0.02   | 1.02 ±<br>0.06 <sup>a</sup>  | 0.9 ±<br>0.02 <sup>c</sup>     | 1.1 ±<br>0.04    | 1.03 ±<br>0.06 <sup>a</sup> | 1.2 ±<br>0.03            | 1.08 ±<br>0.03 <sup>c</sup>  |
| <b>Femoral trabecular bone parameters</b> |                    |                 |                              |                                |                  |                             |                          |                              |
| BV/TV (%)                                 | 3.6 ±<br>1.2       | 4.3 ± 1         | 3.2 ± 1                      | 3.9 ± 1                        | 6.1 ±<br>1.1     | 8.7 ±<br>1.9                | 5.3 ± 1.2                | 6.4 ±0.6                     |
| Tb. Th (mm)                               | 0.059±<br>0.002    | 0.059±<br>0.004 | 0.056±<br>0.002              | 0.055±<br>0.001                | 0.036<br>±0.001  | 0.035 ±<br>0.001            | 0.035±0.<br>001          | 0.035 ±<br>0.002             |
| Tb. Sp (mm)                               | 0.38 ±<br>0.03     | 0.35 ±<br>0.02  | 0.51 ±<br>0.12 <sup>a</sup>  | 0.48 ±<br>0.08 <sup>b</sup>    | 0.274±<br>0.025  | 0.235 ±<br>0.021            | 0.278 ±<br>0.027         | 0.265 ±<br>0.01              |
| Tb. N (1/mm)                              | 0.81 ±<br>0.2      | 0.95 ±<br>0.14  | 0.7 ±<br>0.02                | 0.91<br>±0.13                  | 1.7 ±<br>0.34    | 2.5 <sup>a</sup> ±<br>0.5   | 1.5 ± 0.3                | 1.8 ± 0.1                    |
| <b>Femoral mechanical properties</b>      |                    |                 |                              |                                |                  |                             |                          |                              |
| Ultimate Force (N)                        | 19±1               | 19.4±<br>1.15   | 14.8±<br>0.7 <sup>a</sup>    | 16.4±<br>0.5 <sup>b</sup>      | 18.3±<br>1       | 17.6±<br>0.9                | 15±<br>1.3 <sup>a</sup>  | 12.7±<br>1.5 <sup>b,c</sup>  |
| Stiffness (N/mm)                          | 78.6±<br>3.2       | 79.1±<br>4.9    | 56.8±<br>5 <sup>a</sup>      | 67±<br>4.3                     | 76.7±<br>5.6     | 56.4±<br>4.75 <sup>a</sup>  | 56±<br>10.2 <sup>a</sup> | 48.5±<br>4.9 <sup>b,c</sup>  |
| Energy to Failure (N)                     | 2.9±<br>0.3        | 3.1±<br>0.6     | 1.8±<br>0.5 <sup>a</sup>     | 2±<br>0.3 <sup>b</sup>         | 3.6±<br>0.9      | 3.01±<br>0.6                | 2.5±<br>0.3 <sup>a</sup> | 2.35±<br>0.14                |

1198  
1199

**Supplementary Table 2: WT and FNDC5 KO female and male mice bone responds differently to a low-calcium diet**

1200 Femoral BMD, BMC, cortical and trabecular bone parameters, and mechanical  
1201 properties of 4-5-month-old WT and KO female and male mice under a normal diet or a 2-week  
1202 low calcium diet. n = 5/group. Data presented as mean  $\pm$  standard deviation.

1203 a= significant compared to WT control, b= significant compared to KO control, c=  
1204 significant compared to WT low Ca diet, 2-way ANOVA, significance  $<0.05$ , n= 4-5/group.

1205
